# Supplementary material
Source: publisher figshare collection journal article supplement (https://acs.figshare.com/ndownloader/files/20550483)
Supplement: Supplementary file 1 [file 20550483]

Compound,SMILE,Human EP4 calcium IC50 (nM) ,Mouse EP4 calcium IC50 (nM) ,Human EP1 calcium IC50 (nM) ,Human EP2 calcium IC50 (nM) ,Human EP3 calcium IC50 (nM) ,HLM,,,MLM,,,CYP Inhibition Data for Selected Compounds (20 ¦ÌM),,,,,,Cytotoxicity Activity,,,,
,,,,,,,t1/2 (min),CLint(mic) (L/min/mg),Remaining (T=60 min),t1/2 (min),CLint(mic) (L/min/mg),Remaining (T=60 min),CYP1A2,CYP2B6,CYP2C9,CYP2D6,CYP2E1,CYP3A4,"CT26 IC50 (¦ÌM)
","Panc02 IC50 (¦ÌM)
","EMT-6 IC50 (¦ÌM)
","LLC IC50 (¦ÌM)
","HEK293 IC50 (¦ÌM)
"
15,FC1=CC=C(CN2C(C(F)(F)F)=C(N=N2)C(N[C@@H](C)C3=CC=C(C(O)=O)C=C3)=O)C=C1,>10000,,,,,,,,,,,,,,,,,,,,,
16,FC(F)(F)C1=C(N=NN1CC2=CC=C(C=C2)C(F)(F)F)C(N[C@@H](C)C3=CC=C(C(O)=O)C=C3)=O,>10000,,,,,,,,,,,,,,,,,,,,,
17,O=C(O)C1=CC=C([C@@H](NC(C2=C(C(F)(F)F)N(CC3=CC=CC(C(F)(F)F)=C3)N=N2)=O)C)C=C1,>10000,,,,,,,,,,,,,,,,,,,,,
18,FC1=CC=C(CCN2C(C(F)(F)F)=C(N=N2)C(N[C@H](C)C3=CC=C(C(O)=O)C=C3)=O)C=C1,>10000,,,,,,,,,,,,,,,,,,,,,
19,O=C(O)C1=CC=C([C@@H](NC(C2=C(C(F)(F)F)N(CCOC3=CC=C(F)C=C3)N=N2)=O)C)C=C1,>10000,,,,,,,,,,,,,,,,,,,,,
20,FC(F)(F)C1=CC=C(CN2C=C(N=N2)C(N[C@@H](C)C3=CC=C(C(O)=O)C=C3)=O)C=C1,>10000,,,,,,,,,,,,,,,,,,,,,
21,CC1=C(N=NN1CC2=CC=C(C=C2)C(F)(F)F)C(N[C@@H](C)C3=CC=C(C(O)=O)C=C3)=O,>10000,,,,,,,,,,,,,,,,,,,,,
22,CCC1=C(N=NN1CC2=CC=C(C=C2)C(F)(F)F)C(N[C@@H](C)C3=CC=C(C(O)=O)C=C3)=O,>10000,,,,,,,,,,,,,,,,,,,,,
23,O=C(O)C1=CC=C([C@@H](NC(C2=C(CCC)N(CC3=CC=C(C(F)(F)F)C=C3)N=N2)=O)C)C=C1,>10000,,,,,,,,,,,,,,,,,,,,,
24,FC(F)(F)C1=CC=C(CN2C(C3=CC=CC=C3)=C(N=N2)C(N[C@@H](C)C4=CC=C(C(O)=O)C=C4)=O)C=C1,>10000,,,,,,,,,,,,,,,,,,,,,
25,FC1=CC=C(CN2C(C(N[C@@H](C)C3=CC=C(C(O)=O)C=C3)=O)=C(N=N2)C(F)(F)F)C=C1,2315.7 ¡À 253.8,,,,,,,,,,,,,,,,,,,,,
26,FC(F)(F)C(N=NN1CC2=CC=C(C=C2)C(F)(F)F)=C1C(N[C@@H](C)C3=CC=C(C(O)=O)C=C3)=O,224.8 ¡À 2.9,,,,,,,,,,,,,,,,,,,,,
27,FC(F)(F)C(N=NN1CC2=CC=CC(C(F)(F)F)=C2)=C1C(N[C@@H](C)C3=CC=C(C(O)=O)C=C3)=O,1970.0 ¡À 163.2,,,,,,,,,,,,,,,,,,,,,
28,O=C(O)C1=CC=C([C@@H](NC(C2=C(C(F)(F)F)N=NN2CCC3=CC=C(F)C=C3)=O)C)C=C1,>10000,,,,,,,,,,,,,,,,,,,,,
29,O=C(O)C1=CC=C([C@@H](NC(C2=C(C(F)(F)F)N=NN2CCOC3=CC=C(F)C=C3)=O)C)C=C1,275.5 ¡À 1.3,,,,,,,,,,,,,,,,,,,,,
30,FC(F)(F)C1=CC=C(CN2C(C(N[C@@H](C)C3=CC=C(C(O)=O)C=C3)=O)=CN=N2)C=C1,>10000,,,,,,,,,,,,,,,,,,,,,
31,CC(N=NN1CC2=CC=C(C=C2)C(F)(F)F)=C1C(N[C@H](C)C3=CC=C(C(O)=O)C=C3)=O,>10000,,,,,,,,,,,,,,,,,,,,,
32,CCC(N=NN1CC2=CC=C(C=C2)C(F)(F)F)=C1C(N[C@@H](C)C3=CC=C(C(O)=O)C=C3)=O,>10000,,,,,,,,,,,,,,,,,,,,,
33,CCCC(N=NN1CC2=CC=C(C=C2)C(F)(F)F)=C1C(N[C@@H](C)C3=CC=C(C(O)=O)C=C3)=O,68.8 ¡À 3.0,,,,,,,,,,,,,,,,,,,,,
34,O=C(O)C1=CC=C([C@@H](NC(C2=C(C3=CC=CC=C3)N=NN2CC4=CC=C(C(F)(F)F)C=C4)=O)C)C=C1,8.5 ¡À 3.0,906.3 ¡À 23.2,>10000,>10000,>10000,>145,<9.6,84.90%,,,,,,,,,,>100,>100,>100,>100,>100
35,O=C(N[C@H](C)C1=CC=C(C(O)=O)C=C1)C2=C(N=NN2CC3=CC=CC=C3)C4=CC=CC=C4,646.6 ¡À 207.0,,,,,,,,,,,,,,,,,,,,,
36,FC1=CC=C(CN2C(C(N[C@@H](C)C3=CC=C(C(O)=O)C=C3)=O)=C(N=N2)C4=CC=CC=C4)C=C1,330.2 ¡À 106.2,,,,,,,,,,,,,,,,,,,,,
37,FC1=CC(CN2C(C(N[C@H](C)C3=CC=C(C(O)=O)C=C3)=O)=C(N=N2)C4=CC=CC=C4)=CC=C1F,147.5 ¡À 46.9,,,,,,,,,,,,,,,,,,,,,
38,FC(F)(F)C1=CC(CN2C(C(N[C@H](C)C3=CC=C(C(O)=O)C=C3)=O)=C(N=N2)C4=CC=CC=C4)=CC=C1,23.0 ¡À 7.5,,,,,,,,,,,,,,,,,,,,,
39,COC1=CC=C(CN2C(C(N[C@H](C)C3=CC=C(C(O)=O)C=C3)=O)=C(N=N2)C4=CC=CC=C4)C=C1,9.3 ¡À 2.9,,,,,,,,,,,,,,,,,,,,,
40,COC1=CC(CN2C(C(N[C@H](C)C3=CC=C(C(O)=O)C=C3)=O)=C(N=N2)C4=CC=CC=C4)=CC=C1,96.8 ¡À 30.7,,,,,,,,,,,,,,,,,,,,,
41,FC1=CC(CN2C(C(N[C@@H](C)C3=CC=C(C(O)=O)C=C3)=O)=C(N=N2)C4=CC=CC=C4)=CC=C1OC,29.8 ¡À 10.7,,,,,,,,,,,,,,,,,,,,,
42,COC1=CC(CN2C(C(N[C@H](C)C3=CC=C(C(O)=O)C=C3)=O)=C(N=N2)C4=CC=CC=C4)=CC=C1OC,119.4 ¡À 40.3,,,,,,,,,,,,,,,,,,,,,
43,O=C(O)C1=CC=C([C@@H](NC(C2=C(C3=CC=CC=C3)N=NN2CCOC4=CC=C(F)C=C4)=O)C)C=C1,3.1 ¡À 0.1,132.3 ¡À 2.7,>10000,>10000,>10000,,,,,,,,,,,,,>100,>100,>100,>100,>100
44,O=C(O)C1=CC=C([C@@H](NC(C2=C(C3=CC=CC=C3)N=NN2CCOC4=CC=C(C(F)(F)F)C=C4)=O)C)C=C1,49.1 ¡À 6.4,,,,,,,,,,,,,,,,,,,,,
45,O=C(O)C1=CC=C([C@@H](NC(C2=C(C3=CC=CC=C3)N=NN2CCOC4=CC=CC(C(F)(F)F)=C4)=O)C)C=C1,1.3 ¡À 0.1,135.2 ¡À 1.8,>10000,>10000,>10000,31.4,44.2,25.20%,38.4,36.1,28.50%,30%,51%,67%,30%,67%,no inhibitory activity,>100,>100,>100,>100,>100
46,O=C(N[C@H](C)C1=CC=C(C(O)=O)C=C1)C2=C(N=NN2CC3CCOCC3)C4=CC=CC=C4,>10000,,,,,,,,,,,,,,,,,,,,,
47,O=C(N[C@H](C)C1=CC=C(C(O)=O)C=C1)C2=C(N=NN2CC3CCCCC3)C4=CC=CC=C4,>10000,,,,,,,,,,,,,,,,,,,,,
48,FC(F)(F)C1=CC=C(CN2C(C(N[C@@H](C)C3=CC=C(C(O)=O)C=C3)=O)=C(N=N2)C4CC4)C=C1,52.1 ¡À 4.1,,,,,,,,,,,,,,,,,>100,>100,>100,>100,>100
49,FC(F)(F)C1=CC=C(CN2C(C(N[C@@H](C)C3=CC=C(C(O)=O)C=C3)=O)=C(N=N2)C4CCC4)C=C1,75.3 ¡À 4.2,,,,,,,,,,,,,,,,,,,,,
50,FC(F)(F)C1=CC=C(CN2C(C(N[C@@H](C)C3=CC=C(C(O)=O)C=C3)=O)=C(N=N2)C4CCCC4)C=C1,65.1 ¡À 4.7,,,,,,,,,,,,,,,,,,,,,
51,O=C(O)C1=CC=C([C@@H](NC(C2=C(C3CCCCC3)N=NN2CC4=CC=C(C(F)(F)F)C=C4)=O)C)C=C1,161.3 ¡À 10.5,,,,,,,,,,,,,,,,,,,,,
52,FC(F)(F)C1=CC=C(CN2C(C(N[C@H](C)C3=CC=C(C(O)=O)C=C3)=O)=C(N=N2)C4=CCCC4)C=C1,27.9 ¡À 2.7,400.1 ¡À 23.6,>10000,>10000,>10000,>145,<9.6,90.20%,,,,,,,,,,>100,>100,>100,>100,>100
53,O=C(O)C1=CC=C([C@@H](NC(C2=C(C3=CCCCC3)N=NN2CC4=CC=C(C(F)(F)F)C=C4)=O)C)C=C1,183.0 ¡À 16.0,,,,,,,,,,,,,,,,,,,,,
54,O=C(O)C1=CC=C([C@@H](NC(C2=C(C3=CCOCC3)N=NN2CC4=CC=C(C(F)(F)F)C=C4)=O)C)C=C1,118.8 ¡À 19.9,,,,,,,,,,,,,,,,,,,,,
55,FC(C=C1)=CC=C1C(N=NN2CC3=CC=C(C=C3)C(F)(F)F)=C2C(N[C@@H](C)C4=CC=C(C(O)=O)C=C4)=O,57.9 ¡À 5.8,,,,,,,,,,,,,,,,,,,,,
56,FC(F)(F)C1=CC=C(CN2C(C(N[C@H](C)C3=CC=C(C(O)=O)C=C3)=O)=C(N=N2)C4=CSC=C4)C=C1,12.9 ¡À 1.3,27.5 ¡À 1.9,>10000,>10000,>10000,>145,<9.6,105.80%,>145,<9.6,75.50%,21%,28%,48%,25%,63%,no inhibitory activity,>100,>100,>100,>100,>100
57,FC(F)(F)C1=CC=C(CN2C(C(N[C@H](C)C3=CC=C(C(O)=O)C=C3)=O)=C(N=N2)C4=COC=C4)C=C1,45.6 ¡À 4.7,57.6 ¡À 3.0,>10000,>10000,>10000,>145,<9.6,87.90%,,,,,,,,,,>100,>100,>100,>100,>100
58,CC1=CC=C(S1)C(N=NN2CC3=CC=C(C=C3)C(F)(F)F)=C2C(N[C@@H](C)C4=CC=C(C(O)=O)C=C4)=O,4.6 ¡À 0.1,42.1 ¡À 2.9,>10000,>10000,>10000,,,,,,,,,,,,,>100,>100,>100,>100,>100
59,C/C=C/C(N=NN1CC2=CC=C(C=C2)C(F)(F)F)=C1C(N[C@@H](C)C3=CC=C(C(O)=O)C=C3)=O,6.1 ¡À 0.2,16.2 ¡À 1.7,>10000,>10000,>10000,>145,<9.6,100.20%,>145,<9.6,82.00%,27%,26%,33%,23%,66%,no inhibitory activity,>100,>100,>100,>100,>100
60,C=CCC(N=NN1CC2=CC=C(C=C2)C(F)(F)F)=C1C(N[C@@H](C)C3=CC=C(C(O)=O)C=C3)=O,>1000,,,,,,,,,,,,,,,,,,,,,
61,CC#CC(N=NN1CC2=CC=C(C=C2)C(F)(F)F)=C1C(N[C@H](C)C3=CC=C(C(O)=O)C=C3)=O,32.0 ¡À 1.5,70.9 ¡À 6.3,>10000,>10000,2922.3 ¡À 276.4,>145,<9.6,89.80%,,,,82%,34%,69%,38%,76%,no inhibitory activity,40.5 ¡À 0.1,50.1 ¡À 0.7,30.2 ¡À 0.5,35.8 ¡À 0.2,>100
62,C/C=C/C(N=NN1CC2=CC=C(C=C2)C(F)(F)F)=C1C(NC3(CC3)C4=CC=C(C(O)=O)C=C4)=O,13.9 ¡À 1.4,33.7 ¡À 5.0,,,,,,,,,,,,,,,,,,,,
63,C/C=C/C(N=NN1CC2=CC=C(C=C2)C(F)(F)F)=C1C(N[C@H](C)C3=CC=C(C(O)=O)C=C3)=O,>1000,,,,,,,,,,,,,,,,,,,,,
64,C/C=C/C(N=NN1CC2=CC=C(C=C2)C(F)(F)F)=C1C(NCC3=CC=C(C(O)=O)C=C3)=O,10.5 ¡À 0.5,130.0 ¡À 10.9,,,,,,,,,,,,,,,,,,,,
65,C/C=C/C(N=NN1CC2=CC=C(C=C2)C(F)(F)F)=C1C(NCC(CC3)CCC3C(O)=O)=O,13.9 ¡À 1.1,219.7 ¡À 23.3,,,,,,,,,,,,,,,,,,,,
